# Supplementary material for: MLN4924 (Pevonedistat), a protein neddylation inhibitor, suppresses proliferation and migration of human clear cell renal cell carcinoma
Source: PubMed Central journal article supplement (PMC5514088; doi:10.1038/s41598-017-06098-y), 2017-07-17

## Supplementary Information

### **MLN4924 (Pevonedistat), a protein neddylation inhibitor, suppresses proliferation and migration of human clear cell renal cell carcinoma**

Shuai Tong<sup>1,2</sup>, Yang Si<sup>1,2</sup>, Hefen Yu<sup>1,2</sup>, Lingqiang Zhang<sup>3</sup>, Ping Xie<sup>1,2\*</sup>, Wenguo Jiang<sup>1,2,4\*</sup>

<sup>1</sup>Department of Biochemistry and Molecular Biology, Capital Medical University, Beijing 100069, China.

<sup>2</sup>Beijing Key Laboratory of Cancer & Metastasis Research, Capital Medical University, Beijing 100069, China.

<sup>3</sup>State Key Laboratory of Proteomics, Beijing Proteome Research Center, Beijing Institute of Radiation Medicine, Collaborative Innovation Center for Cancer Medicine, Beijing 100850, China.

<sup>4</sup>Cardiff China Medical Research Collaborative, Cardiff University School of Medicine, Heath Park, Cardiff CF14 4XN, UK.

Correspondence to: [\\*xpxp922@163.com](mailto:xpxp922@163.com); [jiangw@cf.ac.uk](mailto:jiangw@cf.ac.uk).

## S1

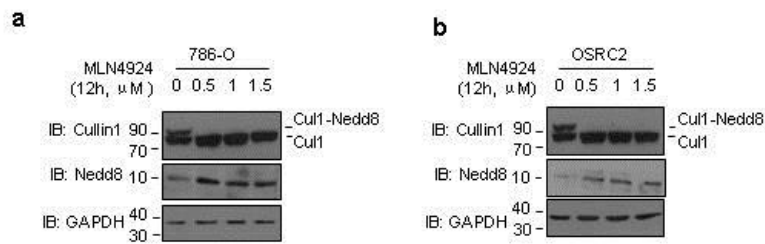

**Figure S1. MLN4924 effectively inhibited Cullin1 neddylation in human ccRCC**

**cells:** Cells were treated with MLN4924 at indicated doses and for 12 hrs before being subjected to Western blot analysis.

## S2

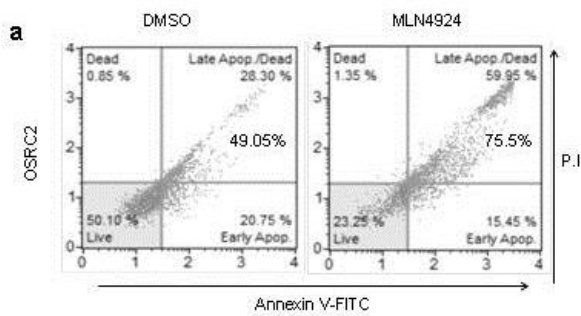

**Figure S2. MLN4924 arrested cell cycle and induced apoptosis in ccRCC cells: (a)**

Cells were treated with DMSO control or MLN4924 at indicated concentrations for 12 hrs, stained with Annexin-V-FITC and PI, and examined with flow cytometry assays.

### S3

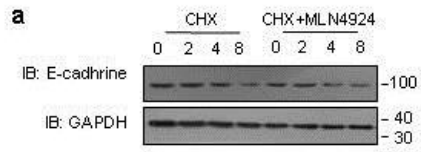

**Figure S3. Effect of MLN4924 on protein half-life of E-cadherin and vimentin:**

Cells were treated with DMSO or MLN4924 containing cycloheximide (CHX, 10 $\mu$ M) for indicated time periods and harvested for Western blot analysis using indicated Abs.

Supplement Table 1. Primer sequences for qRT-PCR

| Gene name  | F or R Primer sequence                                   |
|------------|----------------------------------------------------------|
| GAPDH      | F: GGAGTCAACGGATTTGGT<br>R: GTGATGGGATTTCCATTGAT         |
| E-cadherin | F: CAGAGCCTCTGGATAGAGAACGCA<br>R: GGCATTGTAGGTGTTACATCAT |

**Figure1**

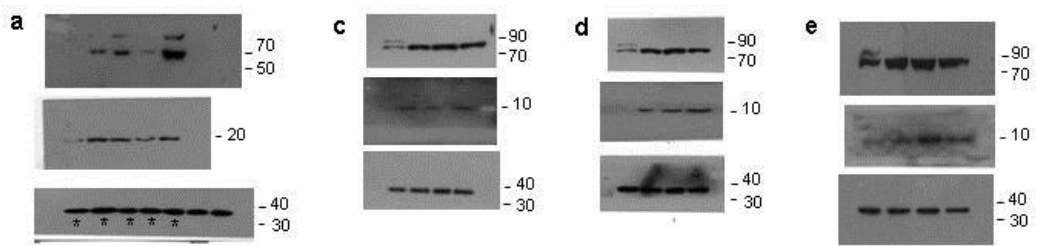

**Figure3**

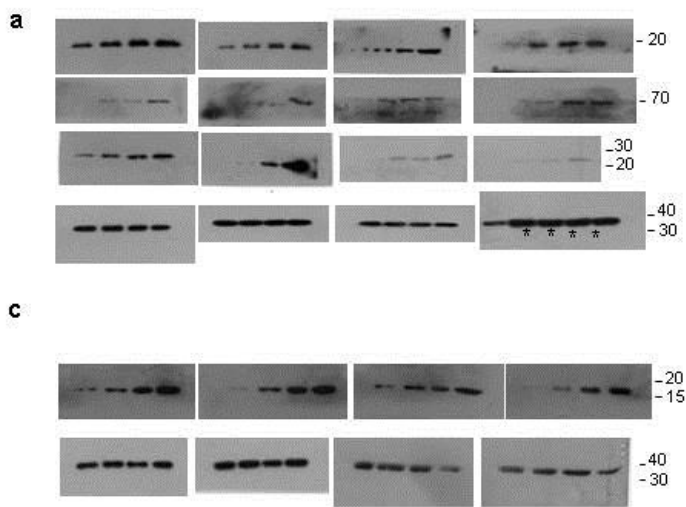

**Figure4**

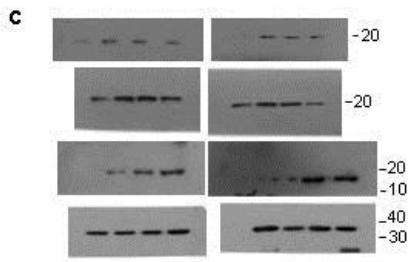

**Figure5**

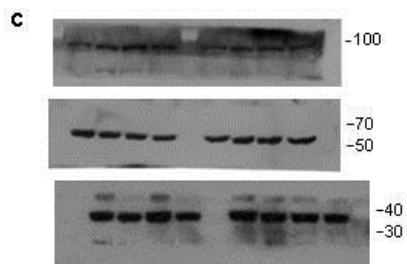

**S1**

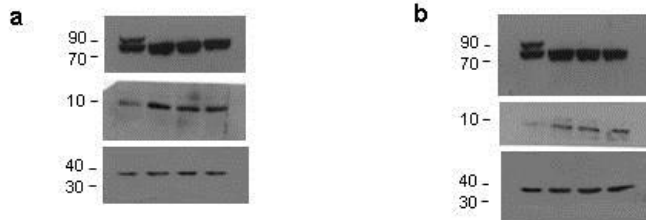

**S3**

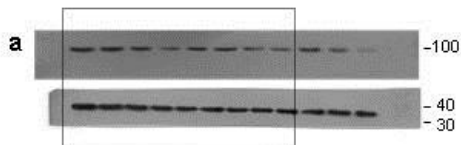

Supplement: 41598_2017_6098_MOESM1_ESM.pdf [file 41598_2017_6098_MOESM1_ESM.pdf]
